# Supplementary material for: TAS-116 inhibits oncogenic KIT signalling on the Golgi in both imatinib-naïve and imatinib-resistant gastrointestinal stromal tumours
Source: PubMed Central journal article supplement (PMC7054534; doi:10.1038/s41416-019-0688-y), 2019-12-20

**Supplementary Figure 1.** Effect of HSP90 inhibition on mutant KIT signaling. (a) *KIT* gene mutation and effects of IM, TAS-116, and 17-AAG in IM-resistant GIST cell lines. (b) Western blot analysis of HSP90, HSP70, pKIT/KIT, pAKT/AKT, and pERK/ERK in GIST cell lysates at 12 h after IM, TAS-116, and 17-AAG treatments was performed. (c-d) GIST cells were treated with 1  $\mu$ M TAS-116 or 0.5  $\mu$ M 17-AAG for 12 h. The cells were stained with anti-KIT (green), anti-phosphorylated KIT Y<sup>703</sup> (anti-KIT Y<sup>703</sup>, green), and anti-GM130 (Golgi marker, red or blue). Dashed lines indicate cell borders. Bars, 20  $\mu$ m.

**Supplementary Figure 2.** Effects of HSP90 inhibition on KIT distribution in GIST R9 cells. (a-c) GIST R9 cells were treated with 1  $\mu$ M TAS-116 or 0.5  $\mu$ M 17-AAG for 12 h. Cells were stained with anti-KIT (green), anti-phosphorylated KIT Y703 (anti-KIT Y<sup>703</sup>, green), anti-GM130 (Golgi marker, red or blue), and anti-PDI antibodies (ER marker, red). Dashed lines indicate cell borders. Bars, 20  $\mu$ m.

# Supplementary Figure 1

**a**

| Cell line   | KIT mutation |              | IC <sub>50</sub> (nM) |       |          |
|-------------|--------------|--------------|-----------------------|-------|----------|
|             | Primary      | Secondary    | TAS-116               | 17AAG | imatinib |
| GIST48/820  | Exon11 V560D | Exon17 D820A | 288.8                 | 47.4  | > 1000   |
| GIST430/654 | Exon11 del   | Exon13 V654A | 164.4                 | 28.5  | > 1000   |

**b**

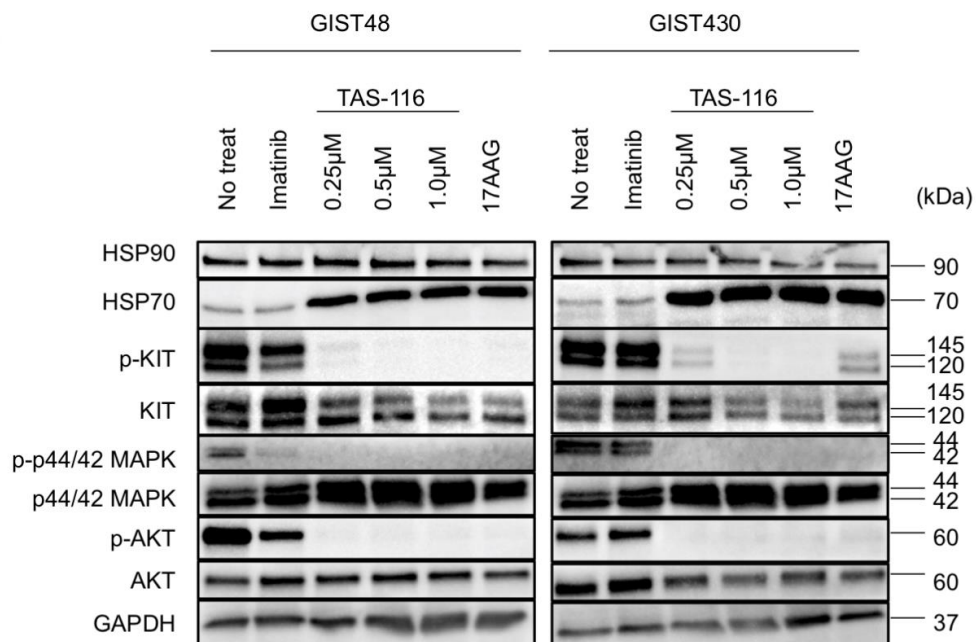

**c**

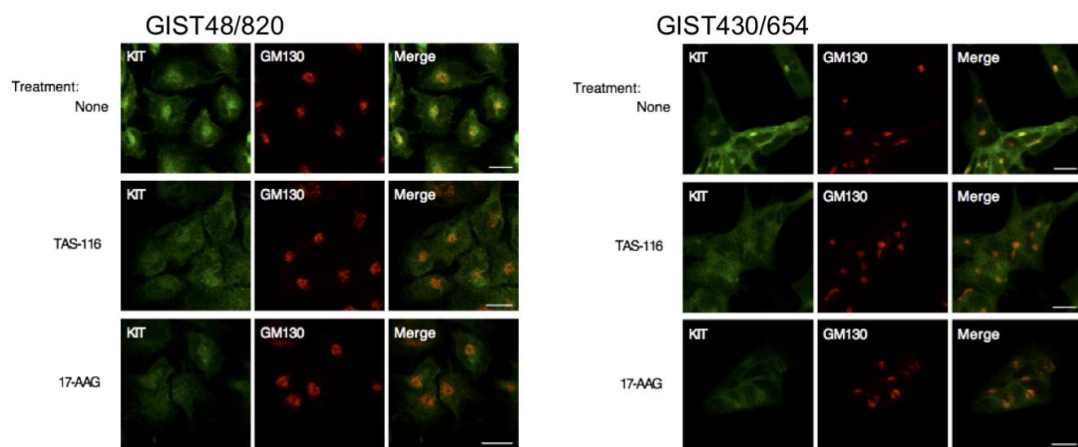

**d**

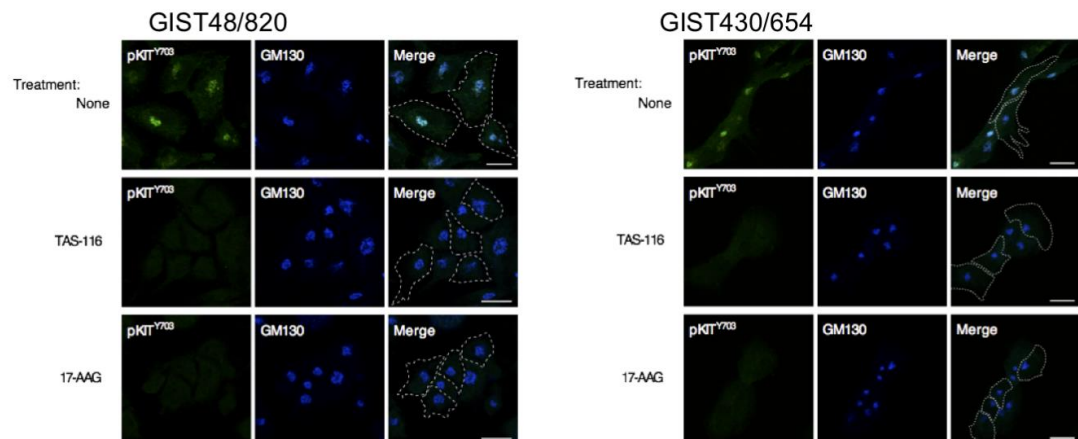

# Supplementary Figure 2

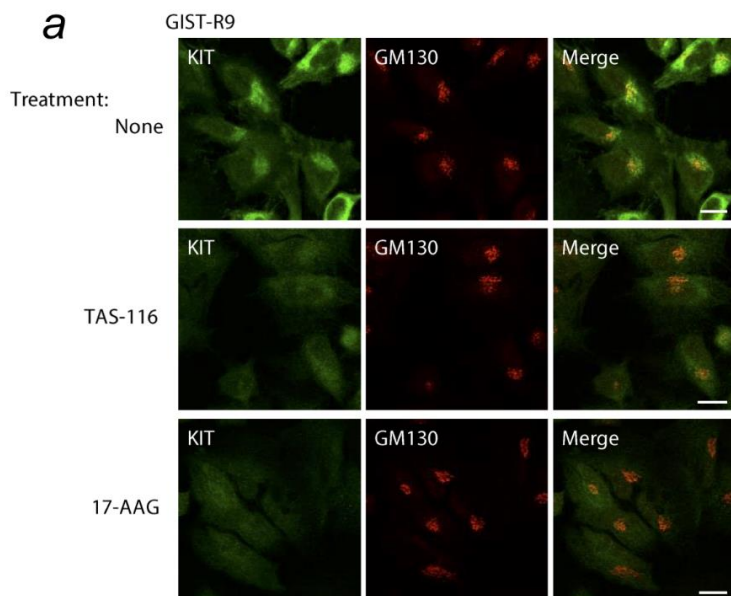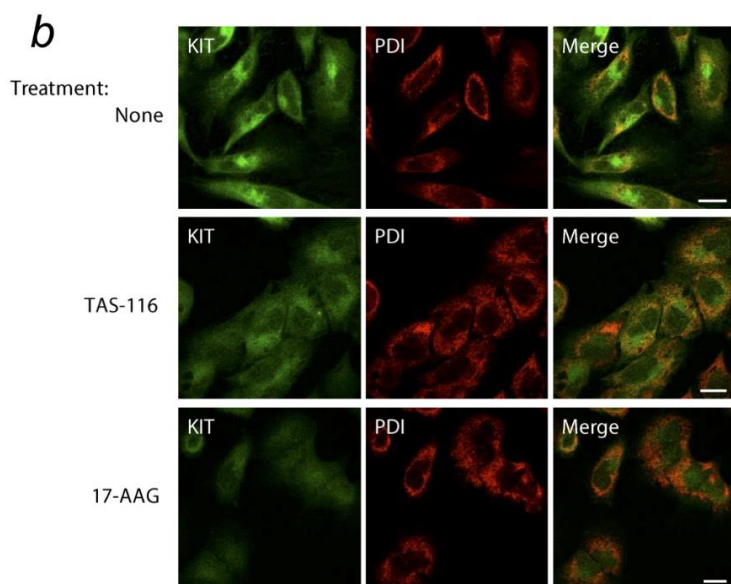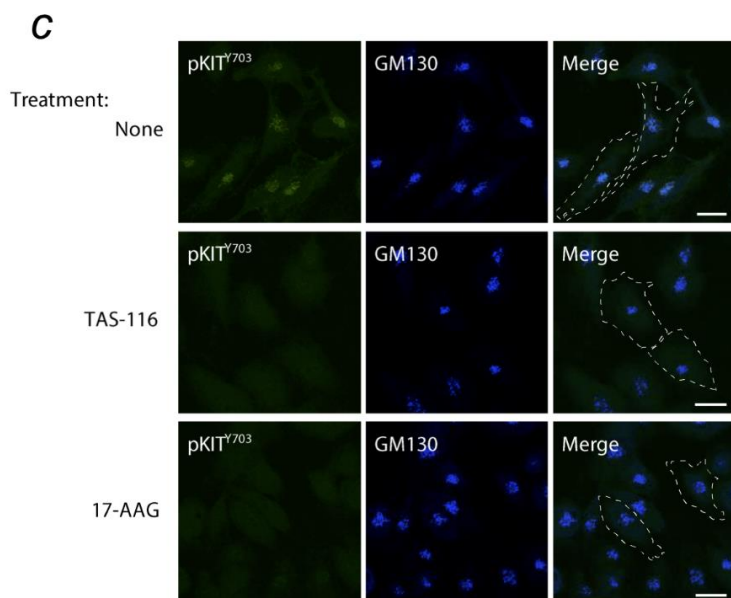

Supplement: 41416_2019_688_MOESM1_ESM.pdf [file 41416_2019_688_MOESM1_ESM.pdf]
